# Supplementary material
Source: PubMed Central journal article supplement (PMC4530033)
Supplement: NIHMS698365-supplement-1.pdf [file NIHMS698365-supplement-1.pdf]

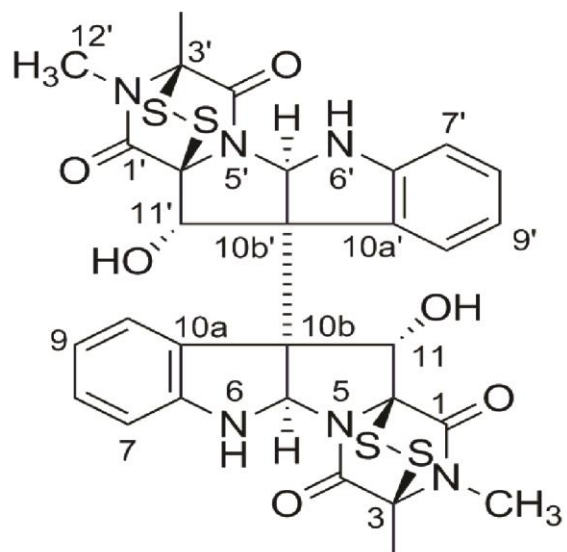

**Figure S1. Verticillin A structure.** The chemical structure of verticillin A is shown.

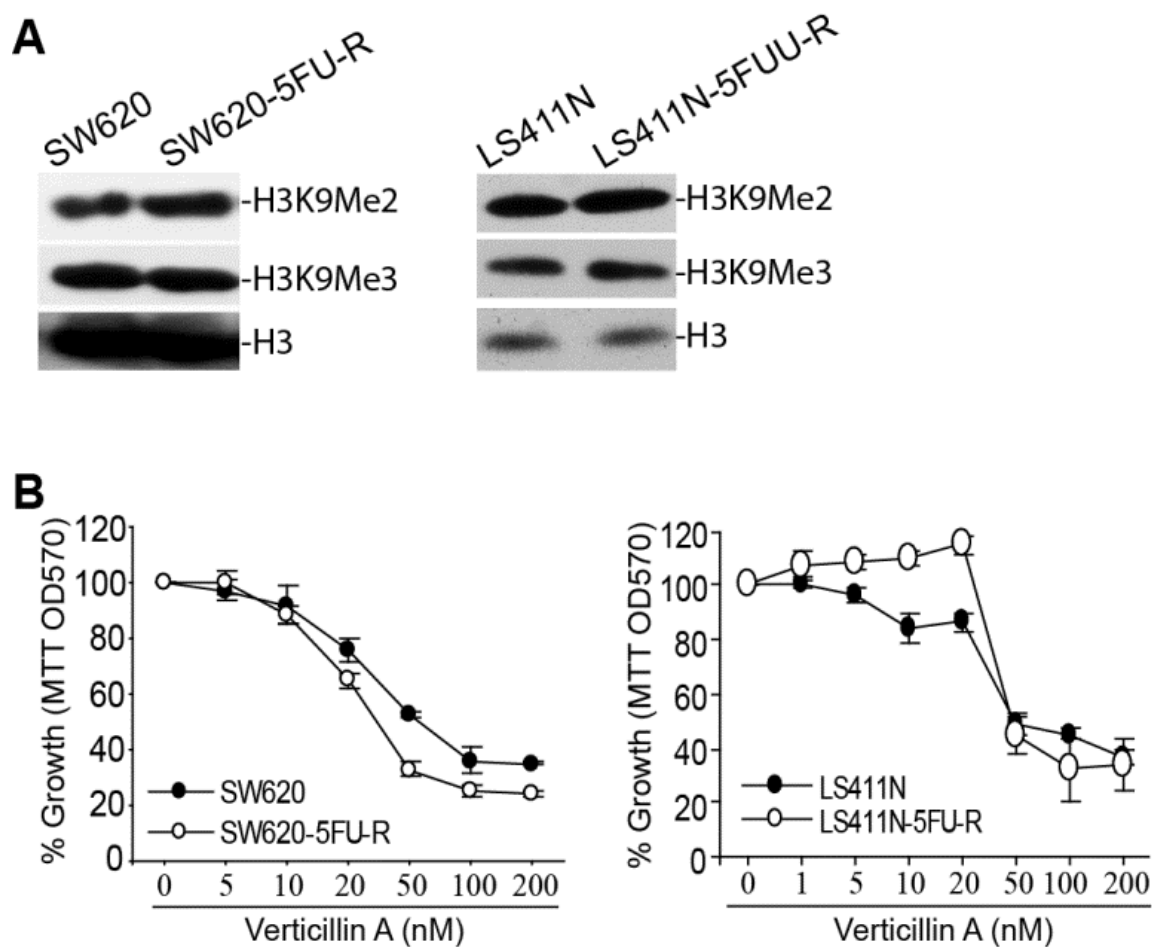

**Figure S2. Verticillin A effectively suppresses 5-FU-resistant metastatic human colon carcinoma cell growth *in vitro*.** A. H3K9Me2/3 level in the parent and 5-FU-resistant human colon carcinoma cells. B. Verticillin A exhibits potent suppressive activity against 5-FU-resistant metastatic human colon carcinoma cells. The indicated tumor cells were cultured in the presence of verticillin A at the indicated doses for 3 days and analyzed for growth using MTT assays.

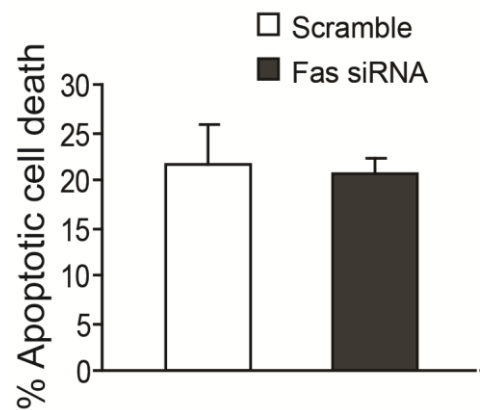

**Figure S3. Silencing Fas expression does not affect verticillin A sensitization of human colon carcinoma cells to 5-FU-induced apoptosis.** SW620-5FUR cells were transfected with scramble of Fas-specific siRNA overnight. Cells were then cultured in the presence of 5-FU (1  $\mu\text{g/ml}$ ) with or without verticillin A (20 nM) for 24h. Cells were then stained with Annexin A and PI. % apoptotic cell death is calculated as % Annexin V+PI+ cells in the presence of verticillin A and 5-FU - % Annexin V+ PI+ cells in the absence of verticillin A and presence of 5-FU.

**Table S1. PCR Primer sequences**

| Gene           | Assay                     | Primer                 | Sequence                         |
|----------------|---------------------------|------------------------|----------------------------------|
| <i>BNIP3</i>   | Methylation-sensitive PCR | Unmethylation-Forward  | 5'-TGTTTTTTTTAAAGGAGAATTTGG-3',  |
| <i>BNIP3</i>   | Methylation-sensitive PCR | Un-methylation-Reverse | 5'-CAAAAACAAAACCTACAATACAC-3'    |
| <i>BNIP3</i>   | Methylation-sensitive PCR | Methylation-Forward    | 5'-TTATCGTTTTTTTTAAAGGAGAATTC-3' |
| <i>BNIP3</i>   | Methylation-sensitive PCR | Methylation-Reverse    | 5'-GAAAACAAAACCTACGATACG-3'      |
| <i>FAS</i>     | Promoter ChIP1            | Forward                | 5'-TTGGGTAACCTTTGGGTGGTCC-3'     |
| <i>FAS</i>     | Promoter ChIP1            | Reverse                | 5'-ATGTGGTTGGTTGTGAAGGGAG-3'     |
| <i>FAS</i>     | Promoter ChIP2            | Forward                | 5'-GGTGGACGATGCCAAAGGAATAC-3'    |
| <i>FAS</i>     | Promoter ChIP2            | Reverse                | 5'-CACTCAGAGAAAGACTTGCGGG-3'     |
| <i>FAS</i>     | RT-PCR Fas region 1*      | Forward                | 5'-ATTATCGTCCAAAAGTGTTAAT-3'     |
| <i>FAS</i>     | RT-PCR Fas region 1*      | Reverse                | 5'-TGCATGTTTTCTGTACTTCCTT-3'     |
| <i>FAS</i>     | RT-PCR Fas region 2*      | Forward                | 5'-ATGAACCAGACTGCGTGCCCTG-3'     |
| <i>FAS</i>     | RT-PCR Fas region 2*      | Reverse                | 5'-AAGAAGAAGACAAAGCCACCCC-3'     |
| <i>FAS</i>     | RT-PCR Fas region 3*      | Forward                | 5'-GTATGTGAACACTGTGACCCTTGC-3'   |
| <i>FAS</i>     | RT-PCR Fas region 3*      | Reverse                | 5'-GGTTTTCCTTCTGTGCTTCTGC-3'     |
| <i>G9A</i>     | RT-PCR                    | Forward                | 5'-TCTCTGATGCTGAGGCTGATGTG-3'    |
| <i>G9A</i>     | RT-PCR                    | Reverse                | 5'-GATGAAGCGGCTGATGTTGC-3'       |
| <i>SUV39H1</i> | RT-PCR                    | Forward                | 5'-GCTATGACTGCCCAAATCGTGTG-3'    |
| <i>SUV39H1</i> | RT-PCR                    | Reverse                | 5'-TGTTCTTGCGAATCTTCTCCAGG-3'    |
| <i>SUV39H2</i> | RT-PCR                    | Forward                | 5'-CGAGGACAGTTCTATGACAACAAGG-3'  |
| <i>SUV39H2</i> | RT-PCR                    | Reverse                | 5'-CAATGCTATTCGGGGAAGACG-3'      |

\* The three PCR primer pairs amplify three different regions of the Fas cDNA.
